# Supplementary material for: Near-road sampling of PM 2. 5 , BC, and fine-particle chemical components in Kathmandu Valley, Nepal
Source: Copernicus journal article supplement (doi:10.5194/acp-17-6503-2017), 2017-06-01
Supplement: Supplementary file 1 [file acp-17-6503-2017-supplement.pdf]

Supplement of Atmos. Chem. Phys., 17, 6503–6516, 2017  
<https://doi.org/10.5194/acp-17-6503-2017-supplement>  
© Author(s) 2017. This work is distributed under  
the Creative Commons Attribution 3.0 License.

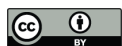

*Supplement of*

## **Near-road sampling of PM<sub>2.5</sub>, BC, and fine-particle chemical components in Kathmandu Valley, Nepal**

**Kabindra M. Shakya et al.**

*Correspondence to:* Richard E. Peltier ([rpeltier@umass.edu](mailto:rpeltier@umass.edu))

The copyright of individual parts of the supplement might differ from the CC BY 3.0 License.

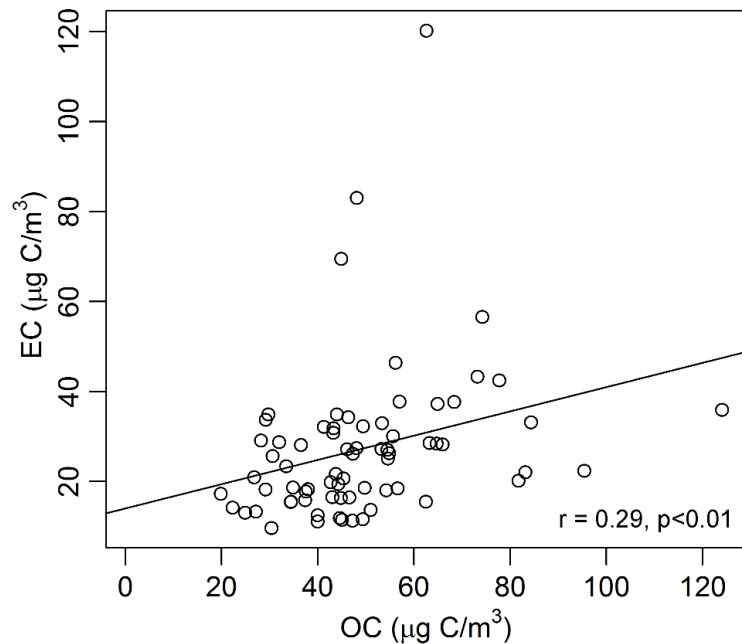

Figure S1. Correlation between EC and OC in  $\text{PM}_{2.5}$  collected in the Kathmandu Valley during spring 2014.

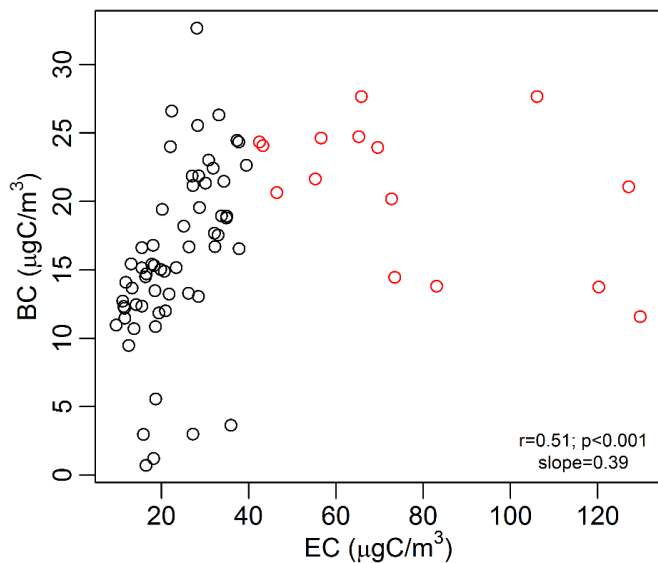

Figure S2. Correlation between EC (in  $\text{PM}_{2.5}$ ) concentrations (from analysis of  $\text{PM}_{2.5}$  filter samples) and BC concentrations (measured with a microaethalometer) in the Kathmandu Valley during the sampling period in the spring season of 2014. The correlation coefficient and slope are shown only for the black circles (i.e., for EC lower than  $40 \mu\text{gC m}^{-3}$ ).

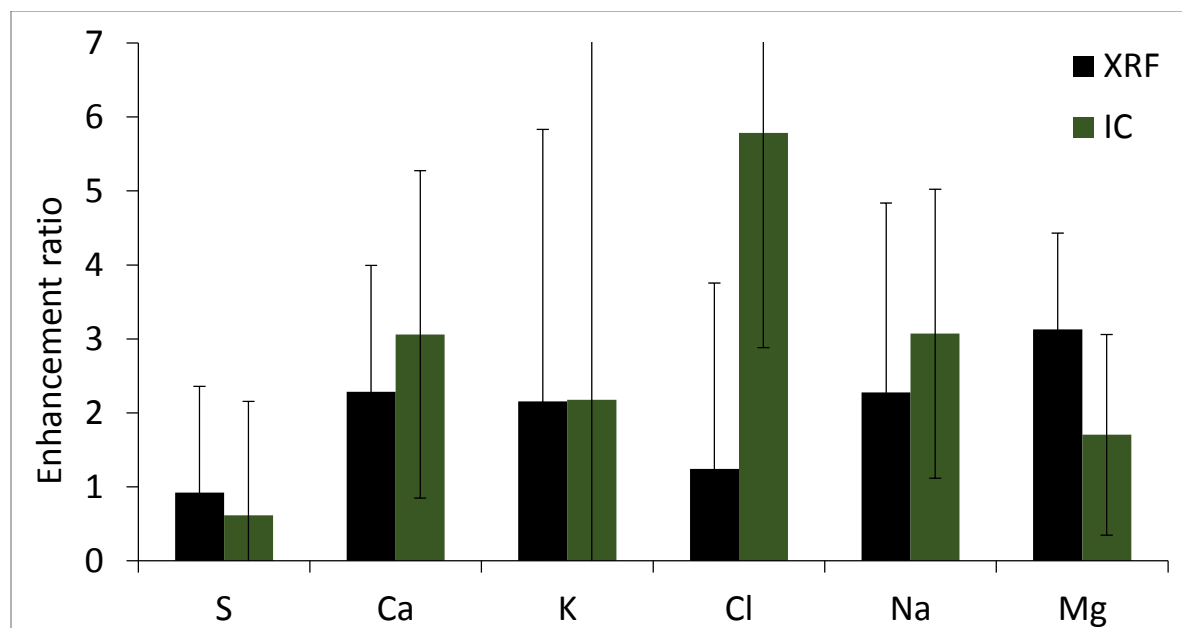

Figure S3. Enhancement ratio of the ions and elements, obtained from the measurements with the IC and XRF.

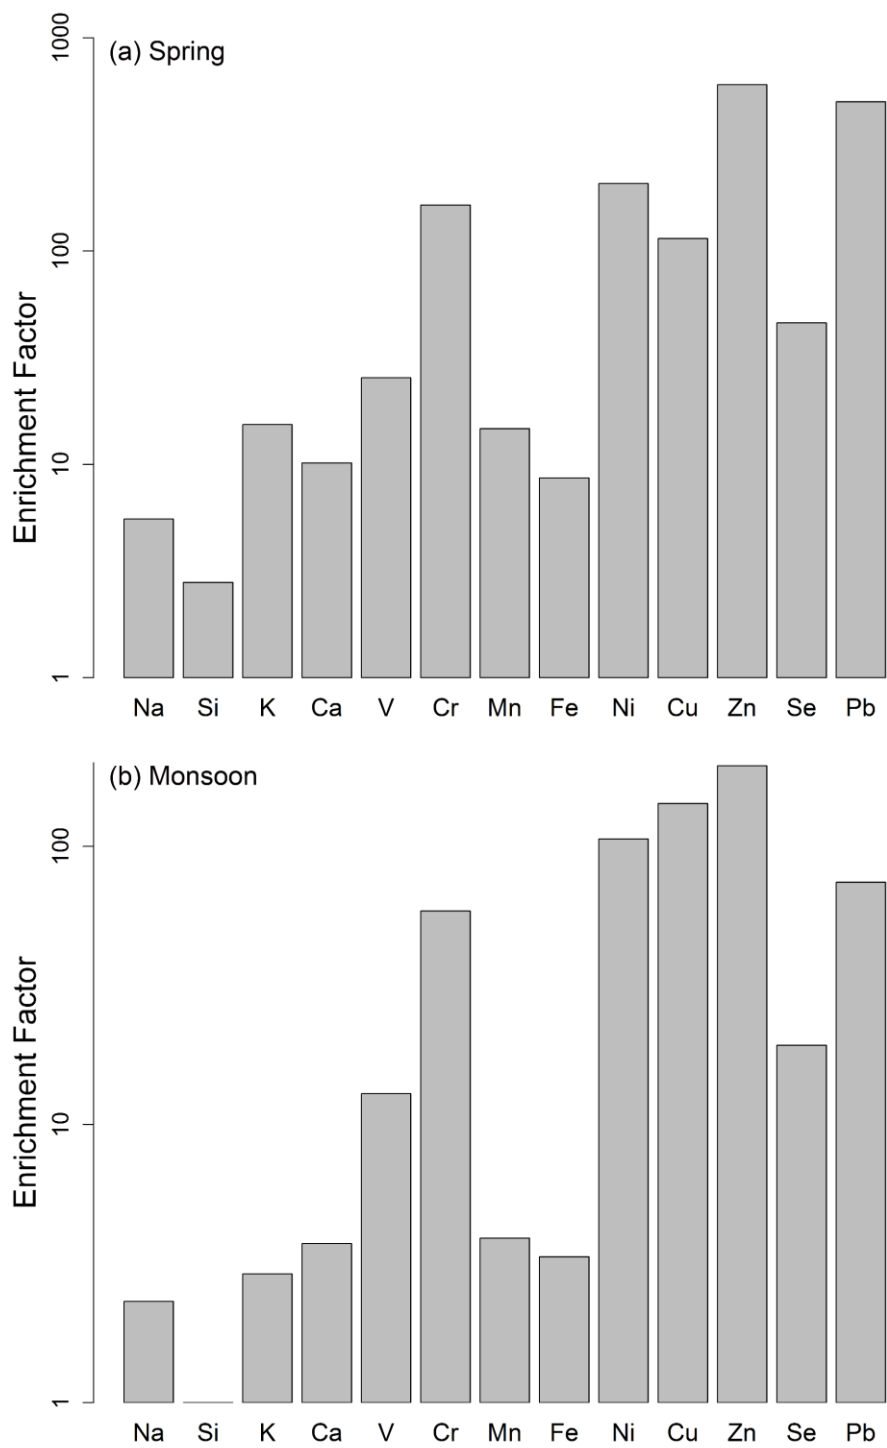

Figure S4. Enrichment factors of elements during (a) spring season and (b) monsoon season.
